# Supplementary material for: Morpho-Functional Traits Reveal Differences in Size Fractionated Phytoplankton Communities but Do Not Significantly Affect Zooplankton Grazing
Source: MDPI journal article supplement (doi:10.3390/microorganisms10010182), 2022-01-14
Supplement: s1 [file s1]

## Supplementary Data

**Supplementary Table S1.** Total abundance (cell L<sup>-1</sup>), total biovolume (µm<sup>3</sup> L<sup>-1</sup>), grazing rates (ml ind<sup>-1</sup> h<sup>-1</sup>) and diversity indices: richness (S), Shannon-Wiener (H') and Pielou's evenness (J') for each size fraction. Values are mean ± standard deviation, n=5 in all treatments except for the start treatment where n=1.

| <i>Fraction &lt;5 µm</i>                             | <i>Start</i>         | <i>Control</i>                              | <i>Eudiaptomus sp.</i>                       | <i>D. longispina</i>                         |
|------------------------------------------------------|----------------------|---------------------------------------------|----------------------------------------------|----------------------------------------------|
| Total Abundance (cell L <sup>-1</sup> )              | 1.36x10 <sup>6</sup> | 3.59x10 <sup>6</sup> ± 1.46x10 <sup>6</sup> | 2.17x10 <sup>6</sup> ± 9.20 x10 <sup>5</sup> | 2.47x10 <sup>6</sup> ± 2.06 x10 <sup>6</sup> |
| Total Biovolume (cell L <sup>-1</sup> )              | 6.62x10 <sup>8</sup> | 3.16x10 <sup>8</sup> ± 1.08x10 <sup>8</sup> | 2.15x10 <sup>8</sup> ± 7.34 x10 <sup>7</sup> | 2.97x10 <sup>8</sup> ± 1.55x10 <sup>8</sup>  |
| Grazing rate (ml ind <sup>-1</sup> h <sup>-1</sup> ) |                      |                                             | 0.66 ± 0.67                                  | 0.92 ± 0.60                                  |
| Richness (S)                                         | 25                   | 25.60 ± 2.88                                | 22.6 ± 1.34                                  | 21.8 ± 1.10                                  |
| Shannon index Abundance (H'a)                        | 2.18                 | 1.21 ± 0.31                                 | 1.27 ± 0.38                                  | 1.33 ± 0.24                                  |
| Shannon index Biovolume (H'b)                        | 1.54                 | 1.66 ± 0.15                                 | 1.57 ± 0.25                                  | 1.40 ± 0.16                                  |
| Evenness index Abundance (J' a)                      | 0.68                 | 0.37 ± 0.08                                 | 0.41 ± 0.12                                  | 0.43 ± 0.08                                  |
| Evenness index Biovolume (J' b)                      | 0.48                 | 0.51 ± 0.04                                 | 0.50 ± 0.08                                  | 0.46 ± 0.06                                  |

  

| <i>Fraction 5-30 µm</i>                              | <i>Start</i>          | <i>Control</i>                              | <i>Eudiaptomus sp.</i>                      | <i>D. longispina</i>                        |
|------------------------------------------------------|-----------------------|---------------------------------------------|---------------------------------------------|---------------------------------------------|
| Total Abundance (cell L <sup>-1</sup> )              | 2.28 x10 <sup>5</sup> | 1.01x10 <sup>6</sup> ± 8.85x10 <sup>5</sup> | 8.03x10 <sup>5</sup> ± 6.54x10 <sup>5</sup> | 6.07x10 <sup>5</sup> ± 4.42x10 <sup>5</sup> |
| Total Biovolume (cell L <sup>-1</sup> )              | 2.38 x10 <sup>8</sup> | 2.85x10 <sup>8</sup> ± 1.36x10 <sup>8</sup> | 1.53x10 <sup>8</sup> ± 6.99x10 <sup>7</sup> | 2.15x10 <sup>8</sup> ± 1.19x10 <sup>8</sup> |
| Grazing rate (ml ind <sup>-1</sup> h <sup>-1</sup> ) |                       |                                             | 0.23 ± 1.70                                 | 0.54 ± 2.04                                 |
| Richness (S)                                         | 21                    | 25.80 ± 4.02                                | 23.2 ± 3.27                                 | 27.2 ± 2.77                                 |
| Shannon index Abundance (H'a)                        | 2.73                  | 1.55 ± 0.52                                 | 1.47 ± 0.36                                 | 1.86 ± 0.29                                 |
| Shannon index Biovolume (H'b)                        | 1.86                  | 1.37 ± 0.66                                 | 1.41 ± 0.40                                 | 1.29 ± 0.37                                 |
| Evenness index Abundance (J' a)                      | 0.90                  | 0.48 ± 0.15                                 | 0.47 ± 0.11                                 | 0.56 ± 0.09                                 |
| Evenness index Biovolume (J' b)                      | 0.61                  | 0.42 ± 0.20                                 | 0.45 ± 0.12                                 | 0.39 ± 0.12                                 |

  

| <i>Fraction &gt;30 µm</i>                            | <i>Start</i>           | <i>Control</i>                                 | <i>Eudiaptomus sp.</i>                       | <i>D. longispina</i>                        |
|------------------------------------------------------|------------------------|------------------------------------------------|----------------------------------------------|---------------------------------------------|
| Total Abundance (cell L <sup>-1</sup> )              | 2.97 x 10 <sup>5</sup> | 7.20 x 10 <sup>5</sup> ± 2.79 x10 <sup>5</sup> | 5.18 x10 <sup>5</sup> ± 1.12x10 <sup>5</sup> | 4.04x10 <sup>5</sup> ± 1.62x10 <sup>5</sup> |
| Total Biovolume (cell L <sup>-1</sup> )              | 3.61 x 10 <sup>8</sup> | 5.02 x10 <sup>8</sup> ± 4.06 x10 <sup>8</sup>  | 2.96x10 <sup>8</sup> ± 2.32x10 <sup>7</sup>  | 4.31x10 <sup>8</sup> ± 1.46x10 <sup>8</sup> |
| Grazing rate (ml ind <sup>-1</sup> h <sup>-1</sup> ) |                        |                                                | 0.41 ± 0.48                                  | 1.01 ± 0.77                                 |
| Richness (S)                                         | 24                     | 28.50 ± 3.42                                   | 24 ± 5.29                                    | 24 ± 4.995                                  |
| Shannon index Abundance (H'a)                        | 2.53                   | 1.90 ± 0.11                                    | 1.99 ± 0.31                                  | 2.17 ± 0.31                                 |
| Shannon index Biovolume (H'b)                        | 1.99                   | 1.24 ± 0.71                                    | 1.18 ± 0.36                                  | 0.72 ± 0.37                                 |
| Evenness index Abundance (J' a)                      | 0.80                   | 0.57 ± 0.02                                    | 0.63 ± 0.06                                  | 0.69 ± 0.09                                 |
| Evenness index Biovolume (J' b)                      | 0.63                   | 0.37 ± 0.21                                    | 0.37 ± 0.09                                  | 0.22 ± 0.10                                 |

**Supplementary Table S2.** Results of the two-way ANOVA of total abundance, biovolume, grazing rates and diversity indices for the different treatments (Start, Control, *D. longispina* and *Eudiaptomus sp.*), and the phytoplankton size fractions (< 5µm, 5-30 µm and > 30 µm) and their interactions. Bold values represent statistically significant results.

| Total Abundance      | Df | Sum of Squares | Mean Square | F value | p-value             |
|----------------------|----|----------------|-------------|---------|---------------------|
| Treatment            | 3  | 6.09E+12       | 2.03E+12    | 2.043   | 0.126               |
| Fraction             | 2  | 4.23E+13       | 2.03E+12    | 21.273  | <b>8.99e-07 ***</b> |
| Treatment x Fraction | 6  | 3.07E+12       | 5.12E+11    | 0.515   | 0.793               |

|                                 |    |                |             |         |                     |
|---------------------------------|----|----------------|-------------|---------|---------------------|
| Residuals                       | 35 | 3.48E+13       | 9.94E+11    |         |                     |
| <b>Total Biovolume</b>          | Df | Sum of Squares | Mean Square | F value | p-value             |
| Treatment                       | 3  | 1.86E+17       | 6.20E+16    | 2.417   | 0.0828              |
| Fraction                        | 2  | 2.66E+17       | 1.33E+17    | 5.194   | <b>0.0106*</b>      |
| Treatment x Fraction            | 6  | 1.19E+17       | 1.98E+16    | 0.772   | 0.597               |
| Residuals                       | 35 | 8.97E+17       | 2.56E+16    |         |                     |
| <b>Grazing rate</b>             | Df | Sum of Squares | Mean Square | F value | p-value             |
| Treatment                       | 1  | 0.75           | 0.7497      | 0.486   | 0.493               |
| Fraction                        | 2  | 1.17           | 0.5849      | 0.379   | 0.689               |
| Treatment x Fraction            | 2  | 0.25           | 0.1274      | 0.083   | 0.921               |
| Residuals                       | 22 | 33.96          | 1.5439      |         |                     |
| <b>Richness</b>                 | Df | Sum of Squares | Mean Square | F value | p-value             |
| Treatment                       | 3  | 83.1           | 27.68       | 2.261   | 0.0985              |
| Fraction                        | 2  | 33.9           | 16.97       | 1.386   | 0.2634              |
| Treatment x Fraction            | 6  | 75.9           | 12.65       | 1.033   | 0.4208              |
| Residuals                       | 35 | 428.6          | 12.25       |         |                     |
| <b>Shannon index Abundance</b>  | Df | Sum of Squares | Mean Square | F value | p-value             |
| Treatment                       | 3  | 2.575          | 0.8583      | 7.646   | <b>0.000466***</b>  |
| Fraction                        | 2  | 4.051          | 2.0256      | 18.044  | <b>4.12e-06 ***</b> |
| Treatment x Fraction            | 6  | 0.331          | 0.0551      | 0.491   | 0.810545            |
| Residuals                       | 35 | 3.929          | 0.1123      |         |                     |
| <b>Shannon index Biovolume</b>  | Df | Sum of Squares | Mean Square | F value | p-value             |
| Treatment                       | 3  | 1.38           | 0.4599      | 2.687   | 0.0614              |
| Fraction                        | 2  | 1.544          | 0.772       | 4.51    | <b>0.0181*</b>      |
| Treatment x Fraction            | 6  | 0.72           | 0.12        | 0.701   | 0.6505              |
| Residuals                       | 35 | 5.991          | 0.1712      |         |                     |
| <b>Evenness index Abundance</b> | Df | Sum OF Squares | Mean Square | F value | p-value             |
| Treatment                       | 3  | 0.2881         | 0.0960      | 10.2110 | <b>5.65e-05 ***</b> |
| Fraction                        | 2  | 0.3654         | 0.1827      | 19.4260 | <b>2.11e-06 ***</b> |
| Treatment x Fraction            | 6  | 0.0353         | 0.0059      | 0.6260  | 0.7080              |
| Residuals                       | 35 | 0.3292         | 0.0094      |         |                     |
| <b>Evenness index Biovolume</b> | Df | Sum OF Squares | Mean Square | F value | p-value             |
| Treatment                       | 3  | 0.1391         | 0.04637     | 3.157   | <b>0.03677*</b>     |
| Fraction                        | 2  | 0.1782         | 0.08909     | 6.066   | <b>0.00547**</b>    |
| Treatment x Fraction            | 6  | 0.0725         | 0.01209     | 0.823   | 0.55971             |
| Residuals                       | 35 | 0.5141         | 0.01469     |         |                     |

**Supplementary Table S3.** Results of the post hoc comparison tests of total abundance, biovolume, Shannon and Evenness indices among fractions and treatments, derived from two-way ANOVA analysis. Bold type indicates significant results.

|                                                |                |
|------------------------------------------------|----------------|
| <i>Post-hoc test</i>                           |                |
| <b>Total Abundance by Fraction</b>             | <b>p-value</b> |
| 5-30 $\mu\text{m}$ vs <5 $\mu\text{m}$         | <0.001         |
| >30 $\mu\text{m}$ vs <5 $\mu\text{m}$          | <0.001         |
| >30 $\mu\text{m}$ vs 5-30 $\mu\text{m}$        | 0.816          |
| <b>Total Biovolume by Fraction</b>             | <b>p-value</b> |
| 5-30 $\mu\text{m}$ vs <5 $\mu\text{m}$         | 0.333          |
| >30 $\mu\text{m}$ vs <5 $\mu\text{m}$          | 0.183          |
| >30 $\mu\text{m}$ vs 5-30 $\mu\text{m}$        | <0.05          |
| <b>Shannon index Abundance by Treatment</b>    | <b>p-value</b> |
| Control vs Start                               | <0.001         |
| <i>D. longispina</i> vs Start                  | <0.05          |
| <i>Eudiaptomus</i> sp. vs Start                | <0.001         |
| <i>D. longispina</i> vs Control                | 0.18           |
| <i>Eudiaptomus</i> sp. vs Control              | 0.981          |
| <i>Eudiaptomus</i> sp. vs <i>D. longispina</i> | 0.324          |
| <b>Shannon index Abundance by Fraction</b>     |                |
| 5-30 $\mu\text{m}$ vs <5 $\mu\text{m}$         | <0.001         |
| >30 $\mu\text{m}$ vs <5 $\mu\text{m}$          | <0.001         |
| >30 $\mu\text{m}$ vs 5-30 $\mu\text{m}$        | <0.05          |
| <b>Shannon index Biovolume by Fraction</b>     | <b>p-value</b> |
| 5-30 $\mu\text{m}$ vs <5 $\mu\text{m}$         | 0.543          |
| >30 $\mu\text{m}$ vs <5 $\mu\text{m}$          | <0.05          |
| >30 $\mu\text{m}$ vs 5-30 $\mu\text{m}$        | 0.147          |
| <b>Evenness index Abundance by Treatment</b>   | <b>p-value</b> |
| Control vs Start                               | <0.001         |
| <i>D. longispina</i> vs Start                  | <0.001         |
| <i>Eudiaptomus</i> sp. vs Start                | <0.001         |
| <i>D. longispina</i> vs Control                | 0.057          |
| <i>Eudiaptomus</i> sp. vs Control              | 0.772          |
| <i>Eudiaptomus</i> sp. vs <i>D. longispina</i> | 0.336          |
| <b>Evenness index Abundance by Fraction</b>    |                |
| 5-30 $\mu\text{m}$ vs <5 $\mu\text{m}$         | <0.05          |
| >30 $\mu\text{m}$ vs <5 $\mu\text{m}$          | <0.001         |
| >30 $\mu\text{m}$ vs 5-30 $\mu\text{m}$        | <0.05          |
| <b>Evenness index Biovolume by Treatment</b>   | <b>p-value</b> |
| Control vs Start                               | 0.323          |
| <i>D. longispina</i> vs Start                  | <0.05          |
| <i>Eudiaptomus</i> sp. vs Start                | 0.327          |
| <i>D. longispina</i> vs Control                | 0.287          |

|                                                |        |
|------------------------------------------------|--------|
| <i>Eudiaptomus</i> sp. vs Control              | 0.999  |
| <i>Eudiaptomus</i> sp. vs <i>D. longispina</i> | 0.259  |
| <b>Evenness index Biovolume by Fraction</b>    |        |
| 5-30 $\mu\text{m}$ vs <5 $\mu\text{m}$         | 0.377  |
| >30 $\mu\text{m}$ vs <5 $\mu\text{m}$          | <0.001 |
| >30 $\mu\text{m}$ vs 5-30 $\mu\text{m}$        | <0.05  |

**Supplementary Table S4.** Traits abundance composition (cell L<sup>-1</sup>). Values are mean  $\pm$  standard deviation, n=5 in all treatments except for the start treatment where n=1 and the control treatment of the fraction > 30  $\mu\text{m}$  where n=4 .

| <i>Fraction &lt;5 <math>\mu\text{m}</math></i>  | <i>Start</i>       | <i>Control</i>                          | <i>Eudiaptomus</i> sp.                  | <i>D. longispina</i>                    |
|-------------------------------------------------|--------------------|-----------------------------------------|-----------------------------------------|-----------------------------------------|
| Mucilage presence                               | 2.70 $\times 10^5$ | 2.91 $\times 10^5 \pm 3.03 \times 10^5$ | 8.46 $\times 10^4 \pm 5.46 \times 10^4$ | 1.32 $\times 10^5 \pm 6.06 \times 10^4$ |
| Mucilage absence                                | 1.09 $\times 10^6$ | 3.43 $\times 10^6 \pm 1.32 \times 10^6$ | 2.09 $\times 10^6 \pm 9.02 \times 10^5$ | 1.93 $\times 10^6 \pm 1.19 \times 10^6$ |
| Flagella presence                               | 8.23 $\times 10^4$ | 1.00 $\times 10^5 \pm 4.97 \times 10^4$ | 8.99 $\times 10^4 \pm 4.08 \times 10^4$ | 7.21 $\times 10^4 \pm 2.40 \times 10^4$ |
| Flagella absence                                | 1.28 $\times 10^6$ | 3.62 $\times 10^6 \pm 1.17 \times 10^6$ | 2.08 $\times 10^6 \pm 9.37 \times 10^5$ | 1.99 $\times 10^6 \pm 1.20 \times 10^6$ |
| Aerotopes presence                              | 4.76 $\times 10^5$ | 2.60 $\times 10^6 \pm 1.05 \times 10^6$ | 1.45 $\times 10^6 \pm 7.71 \times 10^5$ | 1.43 $\times 10^6 \pm 1.09 \times 10^6$ |
| Aerotopes absence                               | 8.86 $\times 10^5$ | 1.12 $\times 10^6 \pm 4.53 \times 10^5$ | 7.19 $\times 10^5 \pm 3.43 \times 10^5$ | 6.41 $\times 10^5 \pm 1.34 \times 10^5$ |
| Unicellular                                     | 8.80 $\times 10^5$ | 9.76 $\times 10^5 \pm 4.33 \times 10^5$ | 6.43 $\times 10^5 \pm 3.17 \times 10^5$ | 5.43 $\times 10^5 \pm 1.70 \times 10^5$ |
| Filaments/colonies                              | 8.91 $\times 10^5$ | 3.51 $\times 10^6 \pm 1.18 \times 10^6$ | 2.00 $\times 10^6 \pm 9.42 \times 10^5$ | 1.90 $\times 10^6 \pm 1.19 \times 10^6$ |
| <i>Fraction 5-30 <math>\mu\text{m}</math></i>   | <i>Start</i>       | <i>Control</i>                          | <i>Eudiaptomus</i> sp.                  | <i>D. longispina</i>                    |
| Mucilage presence                               | 1.29 $\times 10^4$ | 2.39 $\times 10^5 \pm 2.92 \times 10^5$ | 1.11 $\times 10^5 \pm 1.00 \times 10^5$ | 7.95 $\times 10^4 \pm 3.44 \times 10^4$ |
| Mucilage absence                                | 2.15 $\times 10^5$ | 7.72 $\times 10^5 \pm 7.10 \times 10^5$ | 6.92 $\times 10^5 \pm 6.22 \times 10^5$ | 5.27 $\times 10^5 \pm 4.27 \times 10^5$ |
| Flagella presence                               | 9.00 $\times 10^3$ | 5.03 $\times 10^5 \pm 7.77 \times 10^5$ | 4.16 $\times 10^5 \pm 4.30 \times 10^5$ | 2.25 $\times 10^5 \pm 2.24 \times 10^5$ |
| Flagella absence                                | 2.19 $\times 10^5$ | 5.08 $\times 10^5 \pm 5.80 \times 10^5$ | 3.88 $\times 10^5 \pm 3.41 \times 10^5$ | 3.81 $\times 10^5 \pm 2.30 \times 10^5$ |
| Aerotopes presence                              | 3.09 $\times 10^4$ | 1.55 $\times 10^5 \pm 1.86 \times 10^5$ | 4.01 $\times 10^4 \pm 6.79 \times 10^4$ | 2.75 $\times 10^4 \pm 9.73 \times 10^3$ |
| Aerotopes absence                               | 1.97 $\times 10^5$ | 8.56 $\times 10^5 \pm 7.83 \times 10^5$ | 7.63 $\times 10^5 \pm 6.23 \times 10^5$ | 5.79 $\times 10^5 \pm 4.38 \times 10^5$ |
| Unicellular                                     | 1.54 $\times 10^5$ | 7.33 $\times 10^5 \pm 7.04 \times 10^5$ | 6.70 $\times 10^5 \pm 6.16 \times 10^5$ | 4.88 $\times 10^5 \pm 4.21 \times 10^5$ |
| Filaments/colonies                              | 1.29 $\times 10^5$ | 4.70 $\times 10^5 \pm 5.31 \times 10^5$ | 3.84 $\times 10^5 \pm 3.68 \times 10^5$ | 3.64 $\times 10^5 \pm 2.37 \times 10^5$ |
| <i>Fraction &gt;30 <math>\mu\text{m}</math></i> | <i>Start</i>       | <i>Control</i>                          | <i>Eudiaptomus</i> sp.                  | <i>D. longispina</i>                    |
| Mucilage presence                               | nd                 | 1.00 $\times 10^5 \pm 6.14 \times 10^4$ | 1.06 $\times 10^5 \pm 6.44 \times 10^4$ | 5.96 $\times 10^4 \pm 4.83 \times 10^4$ |
| Mucilage absence                                | 2.97 $\times 10^5$ | 6.20 $\times 10^5 \pm 2.39 \times 10^5$ | 4.12 $\times 10^5 \pm 1.36 \times 10^5$ | 3.45 $\times 10^5 \pm 1.47 \times 10^5$ |
| Flagella presence                               | 1.17 $\times 10^5$ | 3.13 $\times 10^5 \pm 3.18 \times 10^5$ | 2.22 $\times 10^5 \pm 8.38 \times 10^4$ | 1.29 $\times 10^5 \pm 8.18 \times 10^4$ |
| Flagella absence                                | 1.79 $\times 10^5$ | 4.07 $\times 10^5 \pm 7.62 \times 10^4$ | 2.96 $\times 10^5 \pm 5.00 \times 10^4$ | 2.76 $\times 10^5 \pm 1.48 \times 10^5$ |
| Aerotopes presence                              | 2.57 $\times 10^4$ | 2.23 $\times 10^5 \pm 1.08 \times 10^5$ | 1.37 $\times 10^5 \pm 1.04 \times 10^5$ | 1.35 $\times 10^5 \pm 7.26 \times 10^4$ |
| Aerotopes absence                               | 2.71 $\times 10^5$ | 4.97 $\times 10^5 \pm 2.58 \times 10^5$ | 3.81 $\times 10^5 \pm 1.47 \times 10^5$ | 2.70 $\times 10^5 \pm 9.70 \times 10^4$ |
| Unicellular                                     | 1.91 $\times 10^5$ | 4.13 $\times 10^5 \pm 2.60 \times 10^5$ | 2.98 $\times 10^5 \pm 1.32 \times 10^5$ | 2.11 $\times 10^5 \pm 8.74 \times 10^4$ |
| Filaments/colonies                              | 1.47 $\times 10^5$ | 3.44 $\times 10^5 \pm 1.01 \times 10^5$ | 2.68 $\times 10^5 \pm 5.97 \times 10^4$ | 2.47 $\times 10^5 \pm 1.43 \times 10^5$ |
